# Supplementary material for: Host-Derived Probiotics Shape the Intestinal Microbial Composition, but not Putative Function in Juvenile Japanese Seabass (Lateolabrax japonicus)
Source: Frontiers journal article supplement (doi:10.3389/fmars.2022.878633), 2022-04-19
Supplement: Data_Sheet_1.docx [file Data_Sheet_1.docx]

**Fig. S1** Rarefaction curve of intestinal microbiota in Japanese seabass, *L. japonicus*. F1, F2, F3, F4, F5 and F6 are the six replicates of group C; B1, B2, B3, B4, B5 and B6 are the six replicates of the group LF3; A1, A2, A3, A4, A5 and A6 are the six replicates of the group LF4.

**
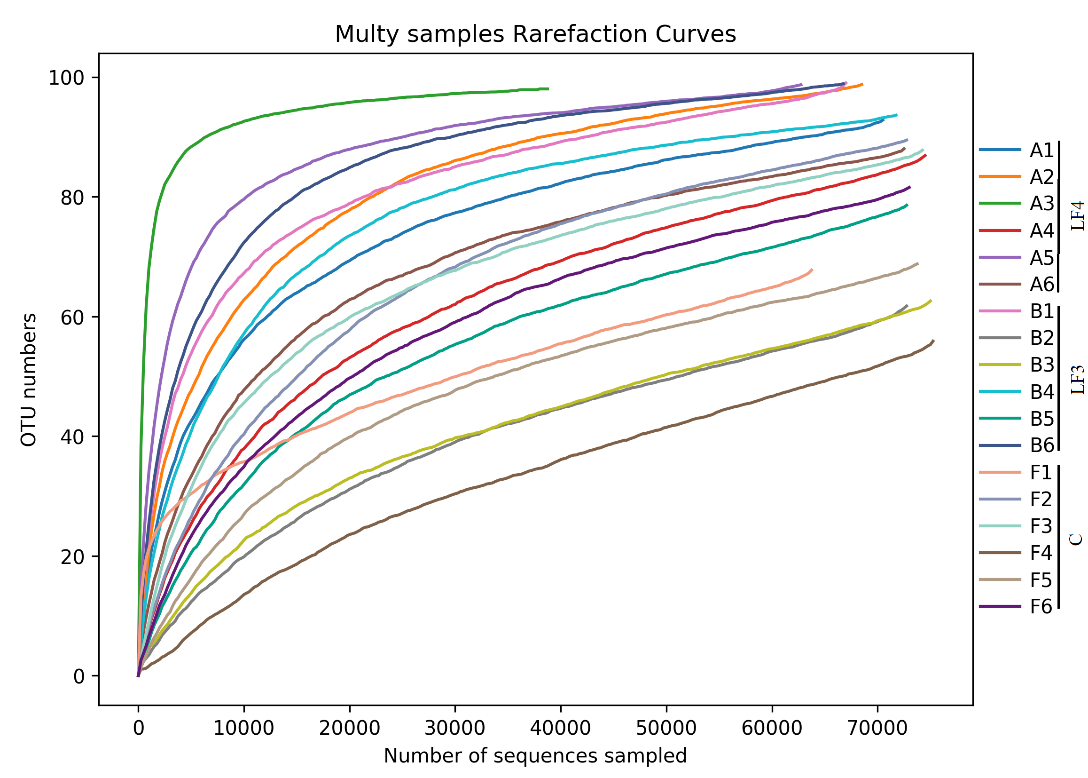
**
